# Supplementary material for: Degradation of β-Carbolines Harman and Norharman in Edible Oils during Heating
Source: MDPI journal article supplement (doi:10.3390/molecules26227018), 2021-11-20
Supplement: s1 [file s1]

# Supplementary Files

## **Degradation of $\beta$ -Carbolines Harman and Norharman in Edible Oils during Heating**

Wei Liu <sup>1,\*</sup>, Zhaoyu Yang <sup>1</sup>, Lili Shi <sup>1</sup>, Ziyu Cui <sup>1</sup>, Yun Li <sup>2,\*</sup>

<sup>1</sup> College of Food Science and Technology, Henan University of Technology,  
Lianhua Street, Zhengzhou 450001, China; 201892085@stu.haut.edu.cn (Z.Y.);  
shililislla@163.com (L.S.); cuiziyu155@163.com (Z.C.)

<sup>2</sup> Key Laboratory of Agro-Products Safety & Quality of the Ministry of  
Agriculture, Institute of Quality Standards & Testing Technology for Agro-  
Products, Chinese Academy of Agricultural Sciences, No.12, Zhongguancun  
South Street, Beijing 100081, China

\* Correspondence: liuwei307@hotmail.com (W.L.); liyun01@caas.cn (Y.L.);  
Tel.: +86-371-67758022 (W.L.)

**Table S1.** Fatty acid compositions (%) of vegetable oils used in this work.

|              | SBO   | SFO   | HOSFO | HOPNO | SSO   |
|--------------|-------|-------|-------|-------|-------|
| C16:0        | 10.85 | 6.55  | 3.71  | 5.85  | 9.63  |
| C18:0        | 4.25  | 3.38  | 2.52  | 2.51  | 6.28  |
| C18:1        | 26.90 | 27.68 | 84.36 | 75.71 | 40.98 |
| C18:2        | 52.07 | 60.89 | 6.75  | 6.90  | 41.15 |
| C18:3        | 4.84  | 0.23  | 0.41  | 1.25  | –     |
| C20:1        | –     | –     | –     | 2.25  | –     |
| C22:0        | –     | –     | –     | 3.29  | –     |
| C24:0        | –     | –     | –     | 2.24  | –     |
| <b>ΣSFA</b>  | 15.10 | 9.93  | 6.23  | 13.89 | 15.91 |
| <b>ΣMUFA</b> | 26.90 | 27.68 | 84.36 | 77.96 | 40.98 |
| <b>ΣPUFA</b> | 56.91 | 61.12 | 7.16  | 8.16  | 41.15 |

Note: soybean oil (SBO), sunflower seed oil (SFO), high-oleic acid sunflower seed oil (HOSFO), high-oleic acid peanut oil (HOPNO) and sesame seed oil (SSO) were used to prepare blend oils. SFA, MUFA and PUFA are the abbreviation of saturated fatty acids, mono-unsaturated fatty acids and poly-unsaturated fatty acids, respectively.

**Table S2.** The contents of 14 HAAs determined in vegetable oils (µg/kg) <sup>a</sup>.

| HAA (µg/kg) | Soybean<br>oil  | Sunflower<br>seed oil | High-oleic<br>acid sunflower<br>seed oil | High-oleic<br>acid peanut<br>oil | Sesame<br>seed oil |
|-------------|-----------------|-----------------------|------------------------------------------|----------------------------------|--------------------|
| AαC         | ND <sup>b</sup> | ND                    | ND                                       | ND                               | ND                 |
| MeAαC       | ND              | ND                    | ND                                       | ND                               | ND                 |
| Trp-P-1     | ND              | ND                    | ND                                       | ND                               | ND                 |
| DMIP        | ND              | ND                    | ND                                       | ND                               | ND                 |
| Glu-P-2     | ND              | ND                    | ND                                       | ND                               | ND                 |
| MeIQ        | ND              | ND                    | ND                                       | ND                               | ND                 |
| MeIQx       | ND              | ND                    | ND                                       | ND                               | ND                 |
| IQ          | ND              | ND                    | ND                                       | ND                               | ND                 |
| PhIP        | ND              | ND                    | ND                                       | ND                               | ND                 |
| 4,8-DiMeIQx | ND              | ND                    | ND                                       | ND                               | ND                 |
| 7,8-DiMeIQx | ND              | ND                    | ND                                       | ND                               | ND                 |
| Harman      | ND              | ND                    | ND                                       | ND                               | 789 ±<br>9.01      |
| Norharman   | ND              | ND                    | ND                                       | ND                               | 890 ±<br>7.95      |
| Trp-P-2     | ND              | ND                    | ND                                       | ND                               | ND                 |

<sup>a</sup> Not detected (ND).<sup>b</sup> Note: heterocyclic aromatic amines (HAAs) were detected by LC-MS.

**Table S3.** The MRM parameters for 14 HAAs and internal standard (4,7,8-TriMeIQx).

| HAAs          | Precursor ion[M + H] <sup>+</sup> (m/z) | Diagnostic Productions (m/z) | Cone voltage (V) | Collision voltage (eV) | Dwell time (msecs) |
|---------------|-----------------------------------------|------------------------------|------------------|------------------------|--------------------|
| AαC           | 184.0                                   | 167.2                        | 108              | 32                     | 30                 |
|               |                                         | 140.0                        | 108              | 32                     |                    |
| MeAαC         | 198.2                                   | 154.1                        | 104              | 40                     | 30                 |
|               |                                         | 127.1                        | 104              | 45                     |                    |
| Trp-P-1       | 212.0                                   | 168.0                        | 80               | 30                     | 30                 |
|               |                                         | 195.2                        | 80               | 40                     |                    |
| DMIP          | 162.9                                   | 147.3                        | 90               | 45                     | 30                 |
|               |                                         | 105.0                        | 90               | 45                     |                    |
| Glu-P-2       | 185.2                                   | 131.1                        | 80               | 40                     | 30                 |
|               |                                         | 78.2                         | 80               | 40                     |                    |
| MeIQ          | 213.1                                   | 198.0                        | 100              | 35                     | 30                 |
|               |                                         | 144.0                        | 100              | 60                     |                    |
| MeIQx         | 214.1                                   | 199.0                        | 100              | 40                     | 30                 |
|               |                                         | 131.0                        | 100              | 55                     |                    |
| IQ            | 199.1                                   | 184.0                        | 100              | 40                     | 30                 |
|               |                                         | 157.0                        | 100              | 50                     |                    |
| PhIP          | 225.3                                   | 210.2                        | 120              | 45                     | 30                 |
|               |                                         | 183.2                        | 120              | 50                     |                    |
| 4,8-DiMeIQx   | 228.1                                   | 211.8                        | 100              | 45                     | 30                 |
|               |                                         | 160.0                        | 100              | 40                     |                    |
| 7,8-DiMeIQx   | 228.0                                   | 131.3                        | 100              | 55                     | 30                 |
|               |                                         | 213.2                        | 100              | 40                     |                    |
| 4,7,8-DiMeIQx | 242.0                                   | 227.1                        | 120              | 40                     | 30                 |
|               |                                         | 145.0                        | 120              | 50                     |                    |
| Harman        | 183.0                                   | 115.0                        | 120              | 50                     | 30                 |
|               |                                         | 168.3                        | 120              | 40                     |                    |
| Norharman     | 169.2                                   | 115.0                        | 100              | 45                     | 30                 |
|               |                                         | 142.0                        | 100              | 40                     |                    |
| Trp-P-2       | 198.0                                   | 154.0                        | 60               | 40                     | 30                 |
|               |                                         | 128.0                        | 60               | 40                     |                    |

Note: heterocyclic aromatic amines (HAAs) were detected by LC-MS.
